# Supplementary material for: Highly active and green mesostructured titanosilicate catalysts synthesized for selective synthesis of benzoquinones
Source: Royal Society of Chemistry journal article supplement (doi:10.1039/c4cy00313f), 2014-01-01
Supplement: c4cy00313f1.pdf [file c4cy00313f1.pdf]

## Supplementary Information

**Table S1.** Structural and textural parameters of calcined TiSBA-15 catalysts

| Catalysts                       | $n_{\text{H}_2\text{O}}/n_{\text{HCl}}$<br>(molar ratio) | $n_{\text{Si}}/n_{\text{Ti}}$ |                      | $a_0$<br>(Å) | $A_{\text{BET}}$<br>(m <sup>2</sup> /g) | $V_p$<br>(cm <sup>3</sup> /g) | $d_p$<br>(Å) | $T_w = a_0 - d_p$<br>(Å) |
|---------------------------------|----------------------------------------------------------|-------------------------------|----------------------|--------------|-----------------------------------------|-------------------------------|--------------|--------------------------|
|                                 |                                                          | Gel                           | Product <sup>a</sup> |              |                                         |                               |              |                          |
| TiSBA-15(6)                     | 295                                                      | 6                             | 18.9                 | 125.0        | 950                                     | 1.09                          | 87.8         | 37.2                     |
| TiSBA-15(15)                    | 295                                                      | 15                            | 33.4                 | 122.0        | 990                                     | 1.09                          | 88.0         | 34.0                     |
| TiSBA-15(20)                    | 295                                                      | 20                            | 42.0                 | 121.6        | 1015                                    | 1.09                          | 88.0         | 33.6                     |
| TiSBA-15(30)                    | 295                                                      | 30                            | 59.4                 | 119.1        | 970                                     | 1.08                          | 87.8         | 31.3                     |
| TiSBA-15(60)                    | 295                                                      | 50                            | 88.6                 | 118.8        | 915                                     | 1.07                          | 87.6         | 31.2                     |
| TiSBA-15(6) <sup>b</sup>        | -                                                        | -                             | 21.4                 | 124.0        | 960                                     | 1.10                          | 87.8         | 36.2                     |
| TiSBA-15(60) <sup>c</sup>       | -                                                        | -                             | 88.6                 | 118.7        | 918                                     | 1.07                          | 87.6         | 31.1                     |
| TiMCM-41(40) <sup>d</sup>       | -                                                        | 40                            | 42.0                 | 48.6         | 1081                                    | 0.80                          | 30.9         | 17.7                     |
| Washed TiSBA-15(6) <sup>e</sup> | -                                                        | -                             | 21.4                 | 124.0        | 967                                     | 1.10                          | 87.8         | 36.2                     |

$a_0$ , unit cell parameter;  $A_{\text{BET}}$ , Specific surface area;  $V_p$ , pore volume;  $d_p$ , pore diameter,  $T_w$ , wall thickness

<sup>a</sup>  $n_{\text{Si}}/n_{\text{Ti}}$  ratios of products are determined by ICP-AES

<sup>b, c</sup> The recyclable catalysts were used for 3<sup>rd</sup> run in the oxidation of TMP-OH

<sup>d</sup> The catalyst was synthesized under basic direct hydrothermal method

<sup>e</sup> Washed mesostructured catalyst was prepared before using in the oxidation of TMP-OH

**Table S2:** Oxidation of TMP-OH with various mesoporous titanium silicate catalysts

| Catalyst                     | Ti loading (wt%) | Surface area (m <sup>2</sup> /g) | Pore diameter (nm) | TMP-OH conversion (%) | TMB=O selectivity (%) | TOF (min <sup>-1</sup> ) | Reference     |
|------------------------------|------------------|----------------------------------|--------------------|-----------------------|-----------------------|--------------------------|---------------|
| Ti, Si catalyst <sup>a</sup> | 1.43             | 1288                             | 3.1                | 100                   | 100                   | 2.3                      | 6a            |
| Ti-MMM-2 <sup>b</sup>        | 1.89             | 976                              | 3.1                | 100                   | 76                    | 3.0                      | 6b and c      |
| Ti/Ti-MMM-2                  | 6.13             | 548                              | 3.0                | 99                    | 96                    | 1.9                      | 6b            |
| Washed TiSBA-15(6)           | 4.67             | 967                              | 8.7                | 100                   | >99                   | 3.4                      | Present study |

<sup>a</sup> The catalyst was synthesized by EISA method

<sup>b</sup> The catalyst was synthesized by hydrothermal method

<sup>c</sup> The catalyst was synthesized by post-grafting method

The catalysts were synthesized by pH-aDH method

### **Reference**

6. (a) I. D. Ivanchikova, M. K. Kovalev, M. S. Mel'gunov, A. N. Shmakov and O. A. Kholdeeva, *Catal. Sci. Technol.*, 2014, **4**, 200-207 (b) O. A. Kholdeeva, I. D. Ivanchikova, M. Guidotti, C. Pirovano, N. Ravasio, M. V. Barmatova and Y. A. Chesalov, *Adv. Synth. Catal.*, 2009, **351**, 1877 (c) O. A. Kholdeeva, I. D. Ivanchikova, M. Guidotti, N. Ravasio, M. Sgobba and M. V. Barmatova, *Catal. Today*, 2009, **141**, 330.

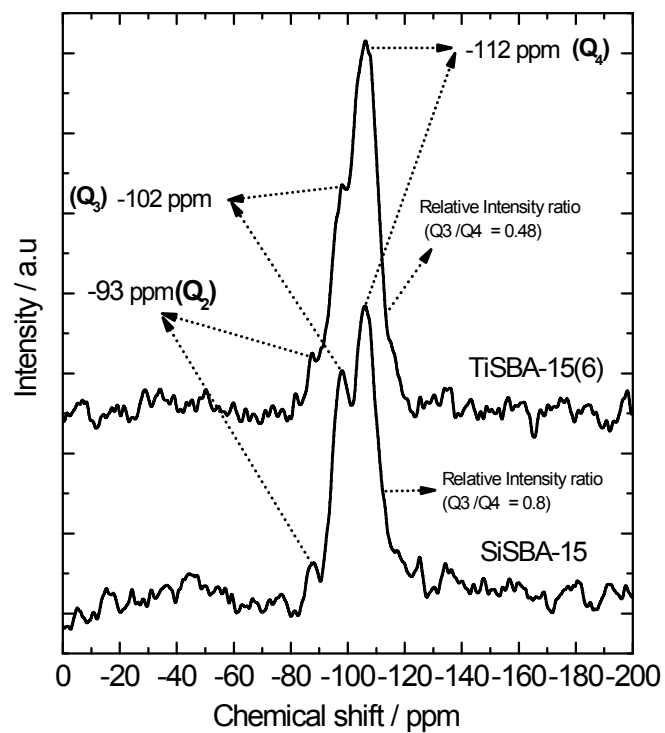

**Figure S1.**  $^{29}\text{Si}$  MAS NMR spectra of calcined SiSBA-15 and TiSBA-15(6)

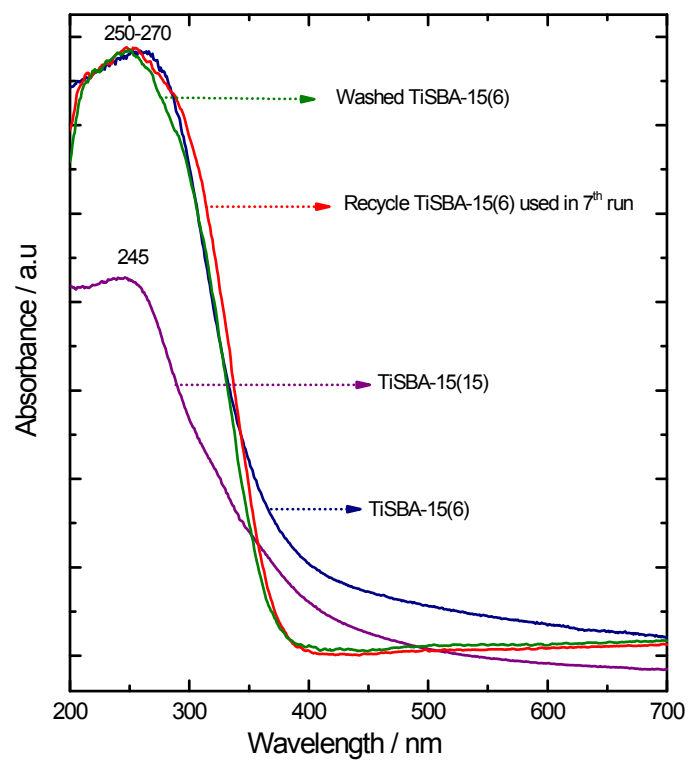

**Figure S2.** UV-vis DR spectra of calcined /recycle /washed TiSBA-15 catalysts

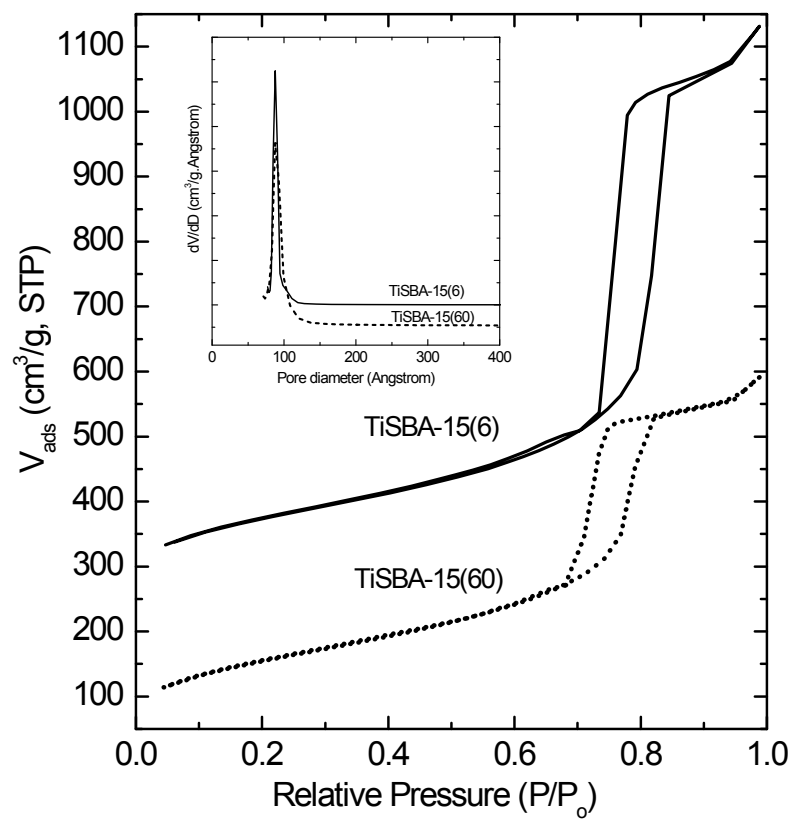

**Figure S3:** Nitrogen adsorption isotherms of calcined TiSBA-15 catalysts

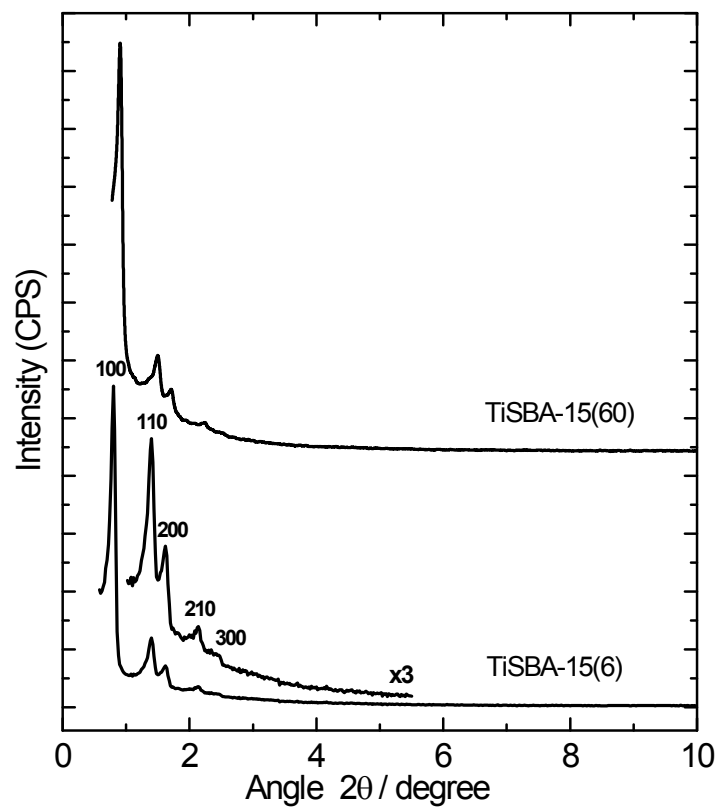

**Figure S4.** XRD powder patterns of calcined TiSBA-15 catalysts
